# Supplementary material for: Injury Activates a Dynamic Cytoprotective Network to Confer Stress Resilience and Drive Repair
Source: PubMed Central journal article supplement (PMC6868510; doi:10.1016/j.cub.2019.09.035), 2019-11-18
Supplement: mmc1.pdf [file mmc1.pdf]

**Current Biology, Volume 29**

**Supplemental Information**

**Injury Activates a Dynamic Cytoprotective Network  
to Confer Stress Resilience and Drive Repair**

**Helen Weavers, Will Wood, and Paul Martin**

### Injury-associated ROS production

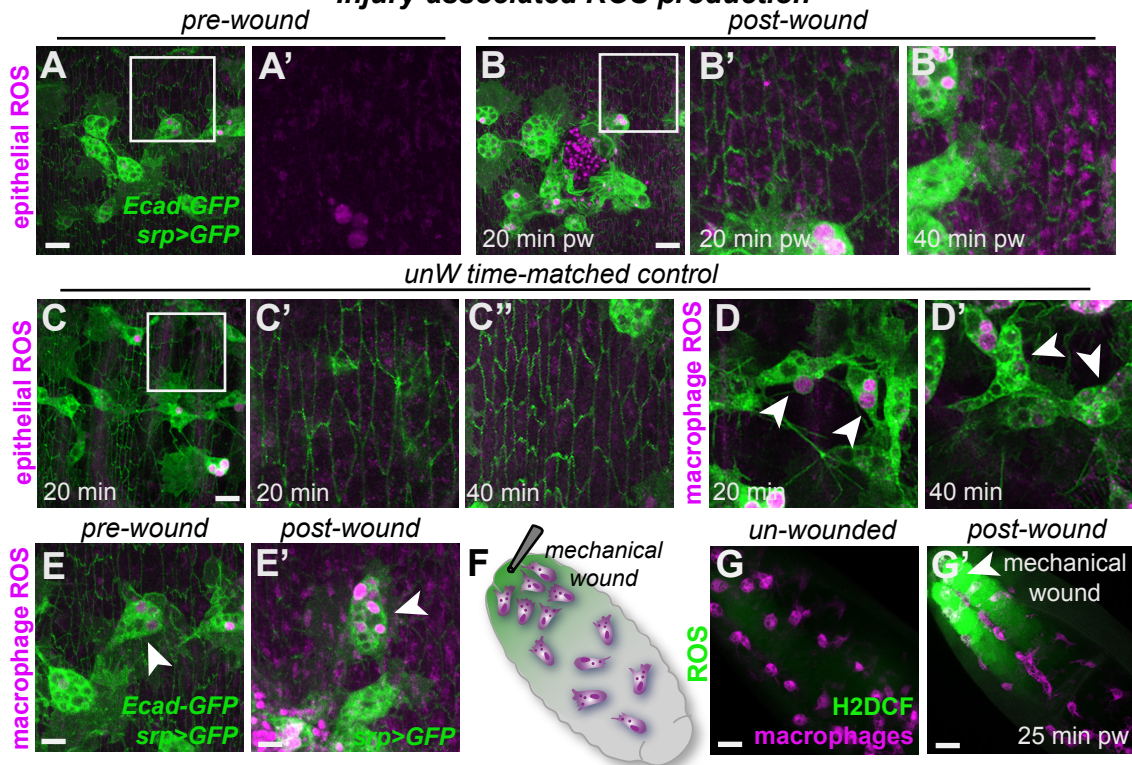

### ROS-dependence of cell damage markers

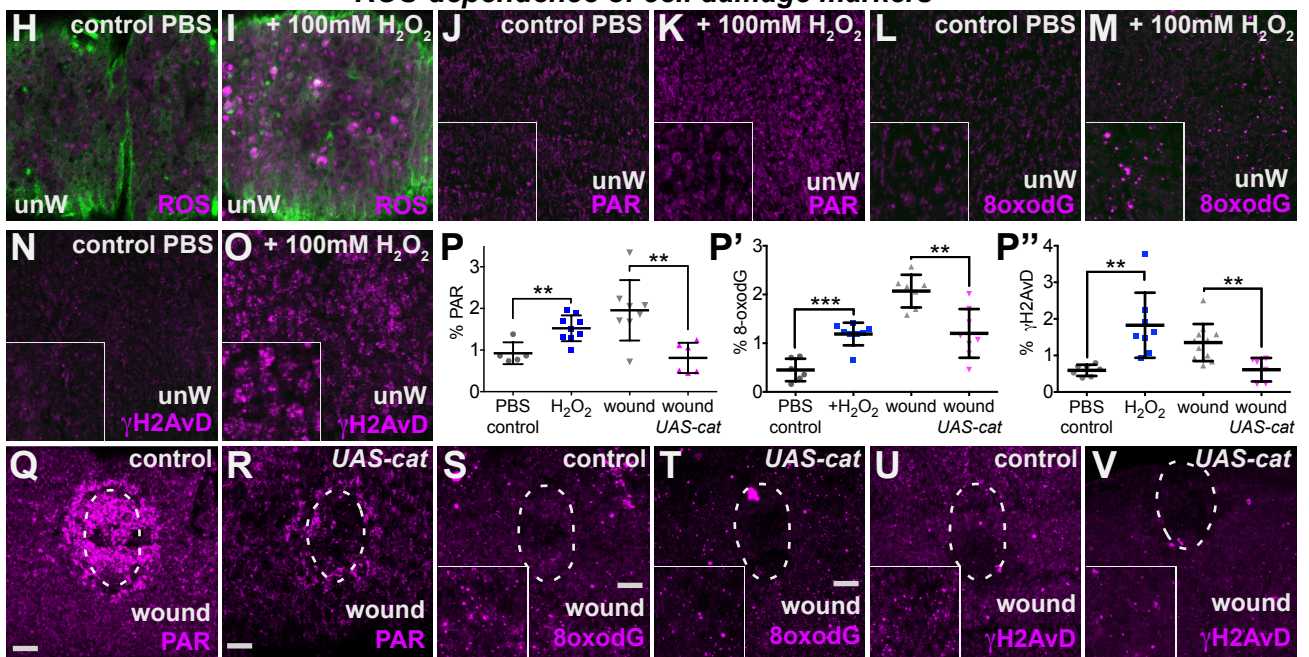

### Hemocyte ablation

### trpm-RNAi wounds

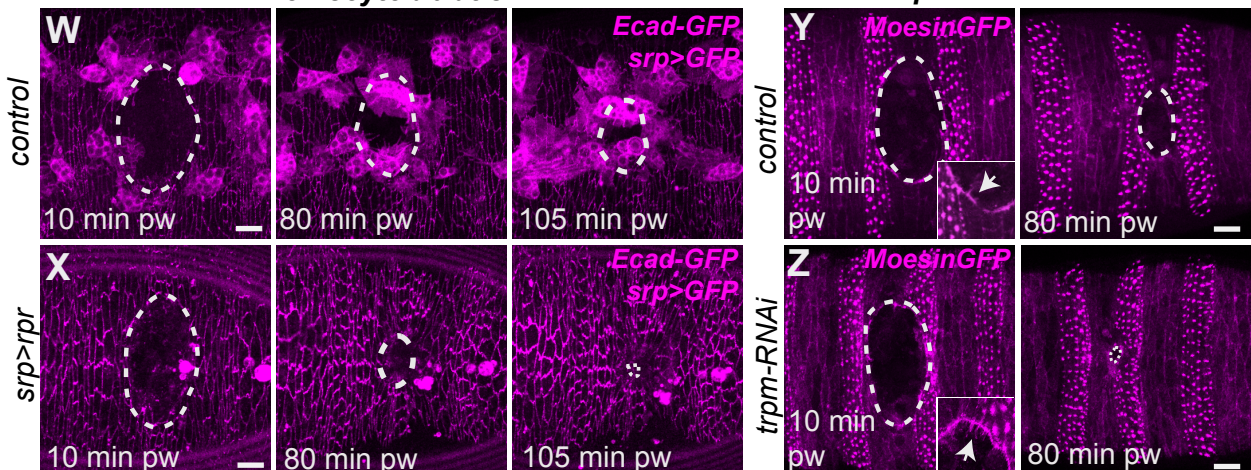

**Figure S1. Wounding in *Drosophila* triggers ROS production and the inflammatory response delays healing. Related to Figure 1.**

Wounding in *Drosophila* embryos triggers an increase in ROS (magenta, DHE labelling superoxide, A-E) levels within the repairing epithelium (A-B; epithelium labelled with *dE-cadherin-GFP*, green, immune cells ('hemocytes') labelled with *srp>GFP*, green) and within immune cells (E). Images in E and E' are different views of the same embryos in panels A and B", respectively. Elevated H<sub>2</sub>O<sub>2</sub> levels (green, H<sub>2</sub>DCF) are also observed following wounding of *Drosophila* embryos (F-G', hemocytes labelled with *srp>GFP*, magenta). Unwounded time-matched controls shown for DHE (C-D) and H<sub>2</sub>DCF (G) staining to control for oxidative conversion of ROS dyes unrelated to wounding. Validation of the ROS-responsive nature of the DNA damage markers (magenta PAR, 8-oxo-dG and  $\gamma$ H<sub>2</sub>AvD) shows that ROS and DNA damage levels are increased following exposure to H<sub>2</sub>O<sub>2</sub> (H-O, quantified in P) compared to controls (PBS alone) whilst they are reduced following expression of the Catalase enzyme (Q-V and quantified in P). Inhibition of inflammation, either by genetic ablation of hemocytes (W-X, *srp>reaper*) or RNAi-mediated inhibition of *trpm* expression (Y-Z), accelerates wound repair (epithelium labelled using Moesin-mCherry) compared to controls.

**UVA-induced ROS, oxidative damage and cell death**

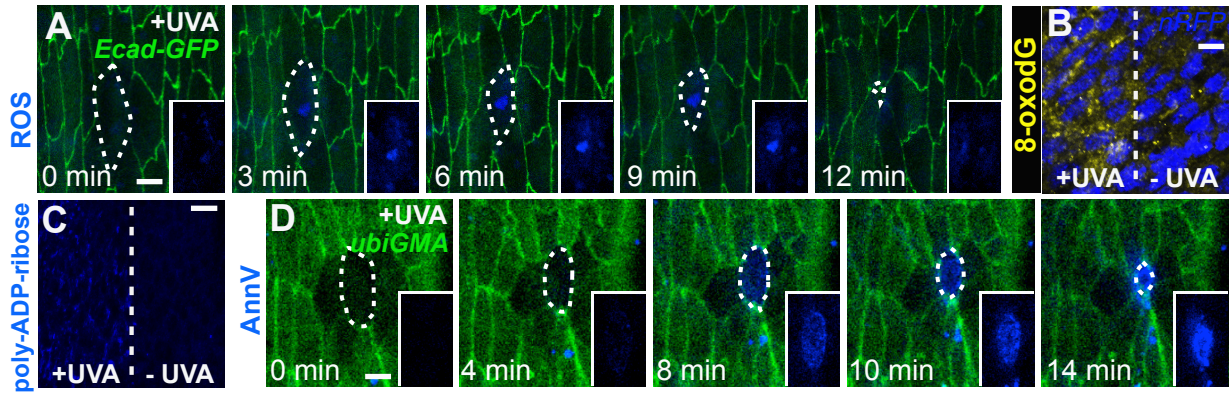

**Macrophage clearance of UV-targeted apoptotic cells**

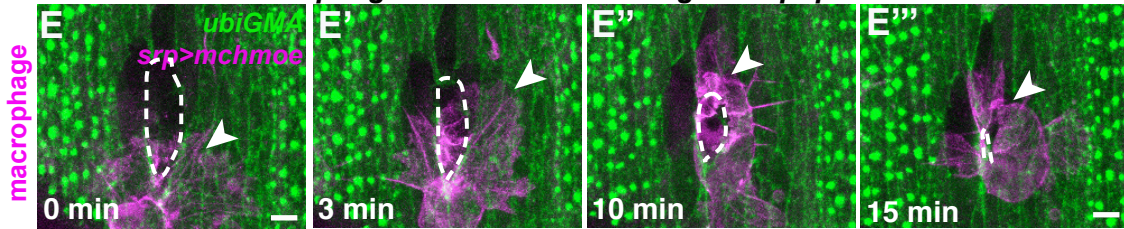

**Macrophages ignore UV-protected cells following wounding**

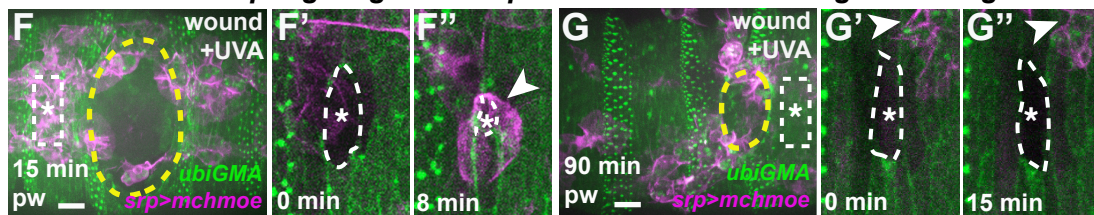

**Transitional 'recovery' behaviour of UV-targeted cells 45min post-wounding**

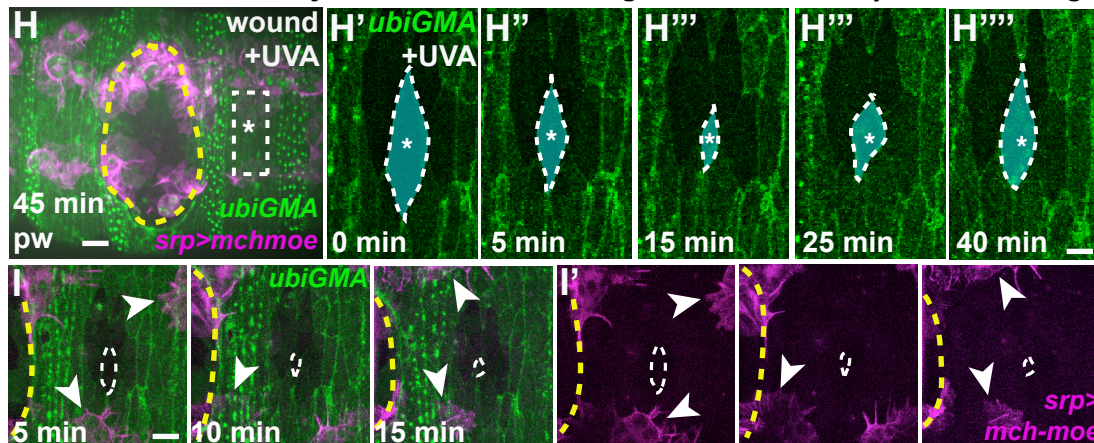

**Figure S2. Wounding in *Drosophila* embryos triggers the induction of stress-resistance. Related to Figure 2.**

UV-A treatment of naïve epithelial cells causes a dramatic increase in levels of ROS (blue, DHE, A), 8-oxo-dG (yellow, B; dashed line delineates UVA-exposed region, left from non-exposed, right), poly-ADP-ribose (blue, C) and AnnexinV staining (blue, D). Delaminating epithelial cells (green, ubiquitous GFP-tagged Moesin) targeted with UV-A within naïve unwounded embryos are cleared by migrating hemocytes (magenta, *srp>Moesin-mCherry*, E) as are UV-targeted cells which delaminate within the first 15min post-wounding (F). Epithelial cells within the protected zone that fail to delaminate are ignored by nearby hemocytes (G). Epithelial cells targeted within 45min post-wounding show a transitional behaviour and recover after initial rounding up (H) and are ignored by nearby hemocytes (I). Images in (I) are taken from the same embryo as shown in (H). pw, post-wounding. Scale bars represent 5 $\mu$ m in panels A-E, F'-F'', G'-G'' and H'-H'''' and 10 $\mu$ m in panels F, G and H.

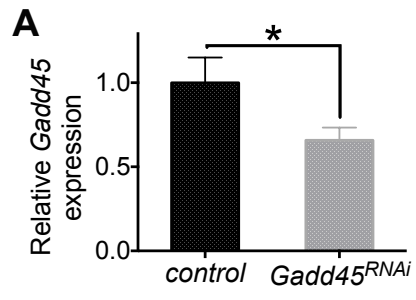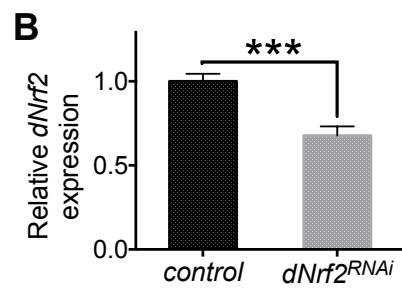

**Figure S3. Nrf2 and Gadd45 RNAi significantly reduce expression levels of their respective targets. Related to Figure 5.**

RT-qPCR of the relative expression of *dNrf2* (A) and *Gadd45* (B) within whole stage 14/15 embryos following *Gal4* mediated expression of *dNrf2-RNAi* (A) and *Gadd45-RNAi* (B) within the embryonic epithelium; threshold cycle (Ct) values normalised to *Rpl32* reveals a significant reduction in *dNrf2* and *Gadd45* expression.

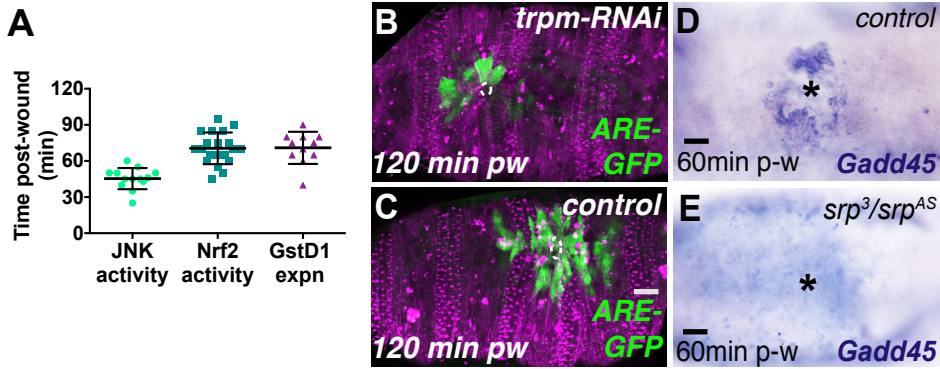

*JNK and Nrf2 signalling are inflammation-independent*

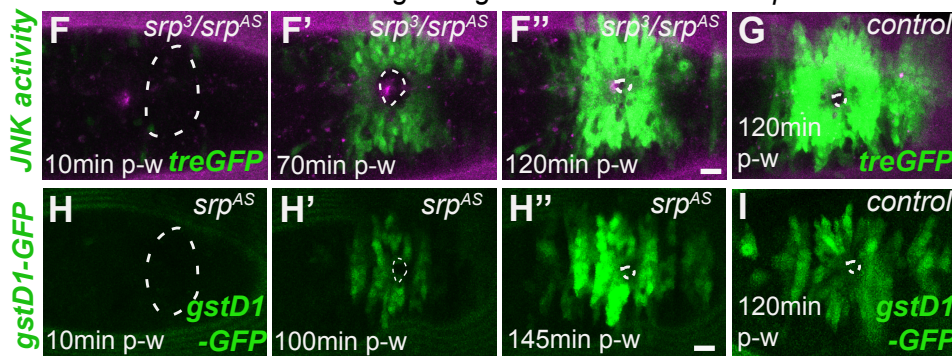

*Injury-induced JNK activity required for wound repair*

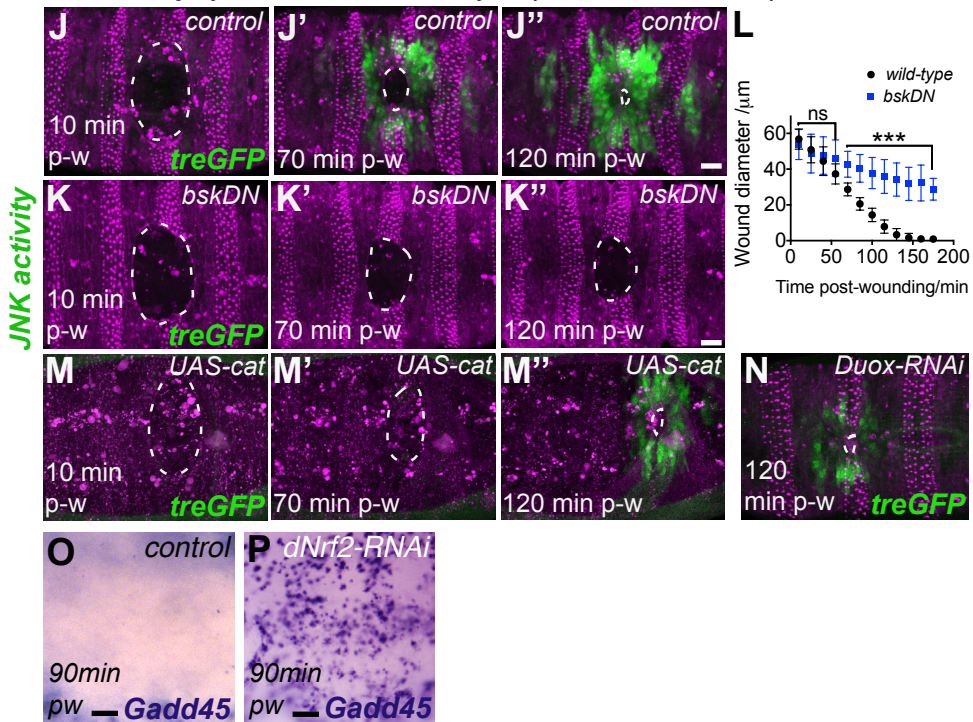



**Figure S4. A dynamic network of wound-induced signalling pathways drive tissue resilience. Related to Figure 6.**

JNK signalling is activated in response to wounding (A, time at which reporter activity first detected within repairing epithelium), prior to that observed for Nrf2 signalling and GstD1 expression. *Trpm-RNAi* mediated inhibition of the inflammatory calcium wave reduced activation of the Nrf2 activity reporter *ARE-GFP* (green, B-C) around the wound site (epithelium magenta, Moesin-mCherry). Wound-induced expression of *Gadd45* (control, D) is reduced in *srp* mutant embryos that lack a wound-induced inflammatory response (E). Inflammation *per se* is not required for wound-induced activation of JNK (green, *tre-GFP*, F-G) or GstD1 expression (green, *gstD-GFP* reporter, H-I) as JNK and GstD1 reporter activity resembles that of control embryos (G and I, respectively) in *srp* mutants. JNK signalling (green, *tre-GFP*, J), activated in response to wounding, is required for efficient wound repair in *Drosophila* embryos as inhibition of JNK signalling using *UAS-basket-dominant-negative* (K) causes a significant delay in wound closure (K and quantified in L). JNK signalling is responsive to ROS levels as expression of Catalase (M) or Duox-RNAi (N) reduced the activation of the *treGFP* JNK reporter. RNAi-mediated inhibition of dNrf2 expression caused elevated *Gadd45* expression (P) in regions of the epithelium that normally lack *Gadd45* (O). pw, post-wounding. Data in represented as mean  $\pm$  SEM; \*p < 0.05, \*\*p < 0.01, \*\*\*p < 0.001 via the multiple t-tests followed by Holm-Sidak multiple comparisons test (L). Scale bars represent 10 $\mu$ m in panels B-P.
